# Supplementary material for: Association between Water Fluoride Levels and Low Birth Weight: National Health and Nutrition Examination Survey (NHANES) 2013–2016
Source: MDPI journal article supplement (doi:10.3390/ijerph19158956), 2022-07-23
Supplement: s1 [file s1]

**Supplemental Table S1.** Logistic Regression showing the association between Water Fluoride and Low Birth Weight and Very Low Birth Weight Across Racial/Ethnic Groups: National Health and Nutrition Examination Survey (NHANES), 2013-2016.

|                                                                                        | Hispanic |            |        | Non-Hispanic White |            |      | Non-Hispanic Black |            |      | Other Race |            |      |
|----------------------------------------------------------------------------------------|----------|------------|--------|--------------------|------------|------|--------------------|------------|------|------------|------------|------|
|                                                                                        | OR       | 95% CI     | p      | OR                 | 95% CI     | p    | OR                 | 95% CI     | p    | OR         | 95% CI     | p    |
| <b>Model 1: Odds of LBW (&lt;2500 grams), ref = Normal Birth Weight (≥2500 grams)</b>  |          |            |        |                    |            |      |                    |            |      |            |            |      |
| Water Fluoride > 0.7 ppm                                                               | 1.49     | 1.13, 1.97 | 0.005  | 1.01               | 0.71, 1.43 | 0.10 | 1.12               | 0.86, 1.45 | 0.41 | 1.43       | 0.98, 2.08 | 0.06 |
| <b>Model 2: Odds of VLBW (&lt;1500 grams), ref = Normal Birth Weight (≥2500 grams)</b> |          |            |        |                    |            |      |                    |            |      |            |            |      |
| Water Fluoride > 0.7 ppm                                                               | 3.50     | 1.66, 7.17 | <0.001 | 1.80               | 0.49, 6.30 | 0.38 | 1.42               | 0.73, 2.79 | 0.30 | 2.42       | 0.81, 7.02 | 0.10 |
| <b>Model 3: Odds of VLBW (&lt;1500 grams), ref = LBW (&lt;2500 grams)</b>              |          |            |        |                    |            |      |                    |            |      |            |            |      |
| Water Fluoride > 0.7 ppm                                                               | 3.60     | 1.55, 8.33 | 0.003  | 1.30               | 0.31, 5.33 | 0.10 | 1.29               | 0.63, 2.65 | 0.49 | 1.81       | 0.57, 5.74 | 0.31 |

Abbreviations: OR, Odds Ratio; CI, Confidence Intervals; LBW, Low Birth Weight; VLBW, Very Low Birth Weight, Water fluoride was a categorical variable and > 0.7 ppm. All models adjusted for mother's age at delivery, education <9<sup>th</sup> grade, and smoking during pregnancy
